# Supplementary material
Source: Springer Nature journal article supplement (https://www.springermedizin.de/resource/supplementary/13054_2011_9827_MOESM1_ESM.pdf/9706958)
Supplement: MOESM1 [file 9706958]

**New Zealand white rabbits  
(n = 16)**

**Control mechanical ventilation  
with BIPAP at baseline**

**Ventilator settings:**  
**P<sub>I</sub>** resulting in a VT 10-15 ml/kg; **RR**  
adjusted to maintain PaCO<sub>2</sub> within  
35-60 mmHg; **FiO<sub>2</sub>**= 0.5; **PEEP** = 2  
cmH<sub>2</sub>O; **I:E**= 1:1.

**randomize**

**Control Ventilation Group  
(n = 8)**

**Control ventilation with  
BIPAP for 8 hours**

**Ventilator settings:**  
Same as baseline

**Sacrifice  
(n = 8)**

**Spontaneous Breathing Group  
(n = 8)**

**Spontaneous breathing with  
BIPAP for 8 hours**

**Ventilator settings:**  
**RR** adjusted to 30 breaths/min to  
regain unsupported spontaneous  
breathings in any phase of BIPAP  
mode; **P<sub>I</sub>**, **FiO<sub>2</sub>**, **PEEP** and **I:E**  
were the same as baseline.

**Sacrifice  
(n = 8)**
